# Supplementary material for: ICU outcomes in Covid-19 patients with obesity
Source: PubMed Central journal article supplement — Ther Adv Respir Dis. 2020 Nov 11;14:1753466620971146. doi: 10.1177/1753466620971146 (PMC7675904; doi:10.1177/1753466620971146), 2020-11-11
Supplement: Reviewer_1_v.1.pdf [file Reviewer_1_v.1.pdf]

Reviewer 1 v.1

Comments to the Author

Recent studies are published on COVID-19 and Obesity doi: 10.1053/j.gastro.2020.08.028

<https://doi.org/10.7326/M20-3742>

Please include the recent data and studies.

Method section: Primary outcomes should not be included under the Statistical analysis. Include the analysis part in the statistical analysis.

Manuscript is otherwise well written.
