# Supplementary material for: ICU outcomes in Covid-19 patients with obesity
Source: PubMed Central journal article supplement — Ther Adv Respir Dis. 2020 Nov 11;14:1753466620971146. doi: 10.1177/1753466620971146 (PMC7675904; doi:10.1177/1753466620971146), 2020-11-11
Supplement: Reviewer_2_v.1.pdf [file Reviewer_2_v.1.pdf]

Reviewer 2 v.1

Comments to the Author

Dear Editor and dear Authors,

Many thanks for your interesting manuscript.

In this letter to the editor Raj Parikh, et al. describe the results of their retrospective study aiming to clarify the relationship between obesity mortality and the need for of IMV in Covid -19 patients admitted to the ICU. The paper is interesting and investigate a worthy topic. However, there are some methodological flaws which have to be addressed.

1. Logistic regression analysis has been adjusted only for age sex and asthma but the outcome in patients admitted in ICU may have many other confounding factors (including time to mechanical ventilation, kind of support, pulmonary compliance, degree of pressure ventilation, degree of intrapulmonary shunting, eventual suvra infections, etc...).

2. The authors didn't report if consider as outcome 30-day mortality or 15-day mortality
